# Supplementary material for: Keeping pace with climate change in global terrestrial protected areas
Source: PubMed Central journal article supplement — Sci Adv. 2020 Jun 17;6(25):eaay0814. doi: 10.1126/sciadv.aay0814 (PMC7299617; doi:10.1126/sciadv.aay0814), 2020-06-17
Supplement: aay0814_SM.pdf [file aay0814_SM.pdf]

[advances.sciencemag.org/cgi/content/full/6/25/eaay0814/DC1](https://advances.sciencemag.org/cgi/content/full/6/25/eaay0814/DC1)

## Supplementary Materials for

### **Keeping pace with climate change in global terrestrial protected areas**

Paul R. Elsen\*, William B. Monahan, Eric R. Dougherty, Adina M. Merenlender

\*Corresponding author. Email: [pelsen@wcs.org](mailto:pelsen@wcs.org)

Published 17 June 2020, *Sci. Adv.* **6**, eaay0814 (2020)  
DOI: [10.1126/sciadv.aay0814](https://doi.org/10.1126/sciadv.aay0814)

#### **This PDF file includes:**

Figs. S1 to S7  
Tables S1 to S3

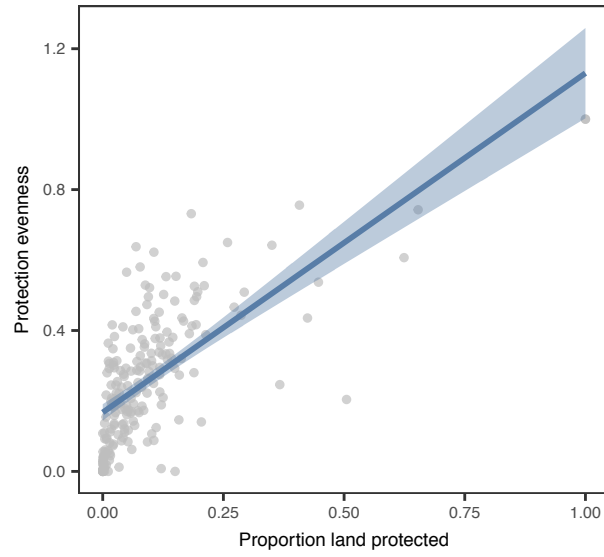

**Fig. S1. Relationship between protection evenness and the proportion of land area protected.** Grey points represent countries ( $n = 205$ ); colored line is a linear model fit with 95% CI (shaded region).

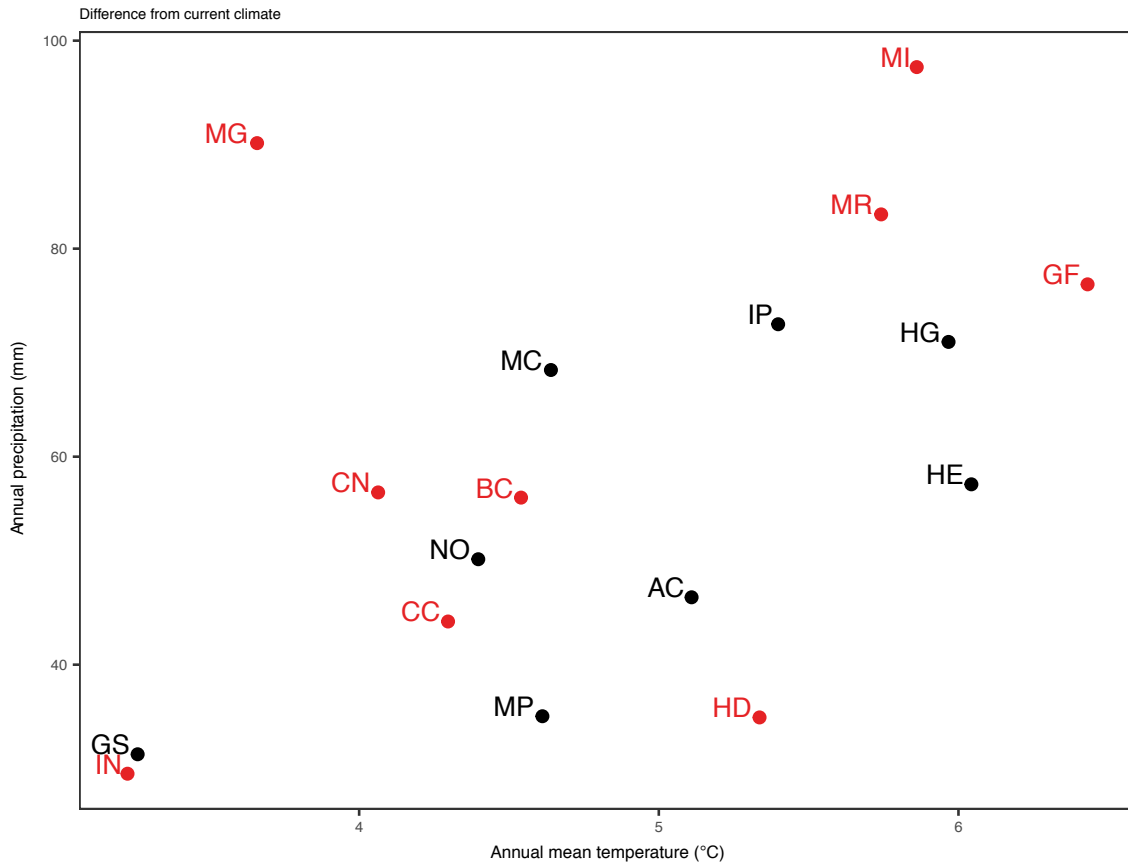

**Fig. S2. Degree of global change for 19 GCMs.** Scatterplot of the difference in future climate from current along axes of annual mean temperature and total annual precipitation for all general circulation models under the RCP8.5 future scenarios obtained from WorldClim. Red points and codes depict models analyzed in this study. See Table S1 for GCMs associated with codes.

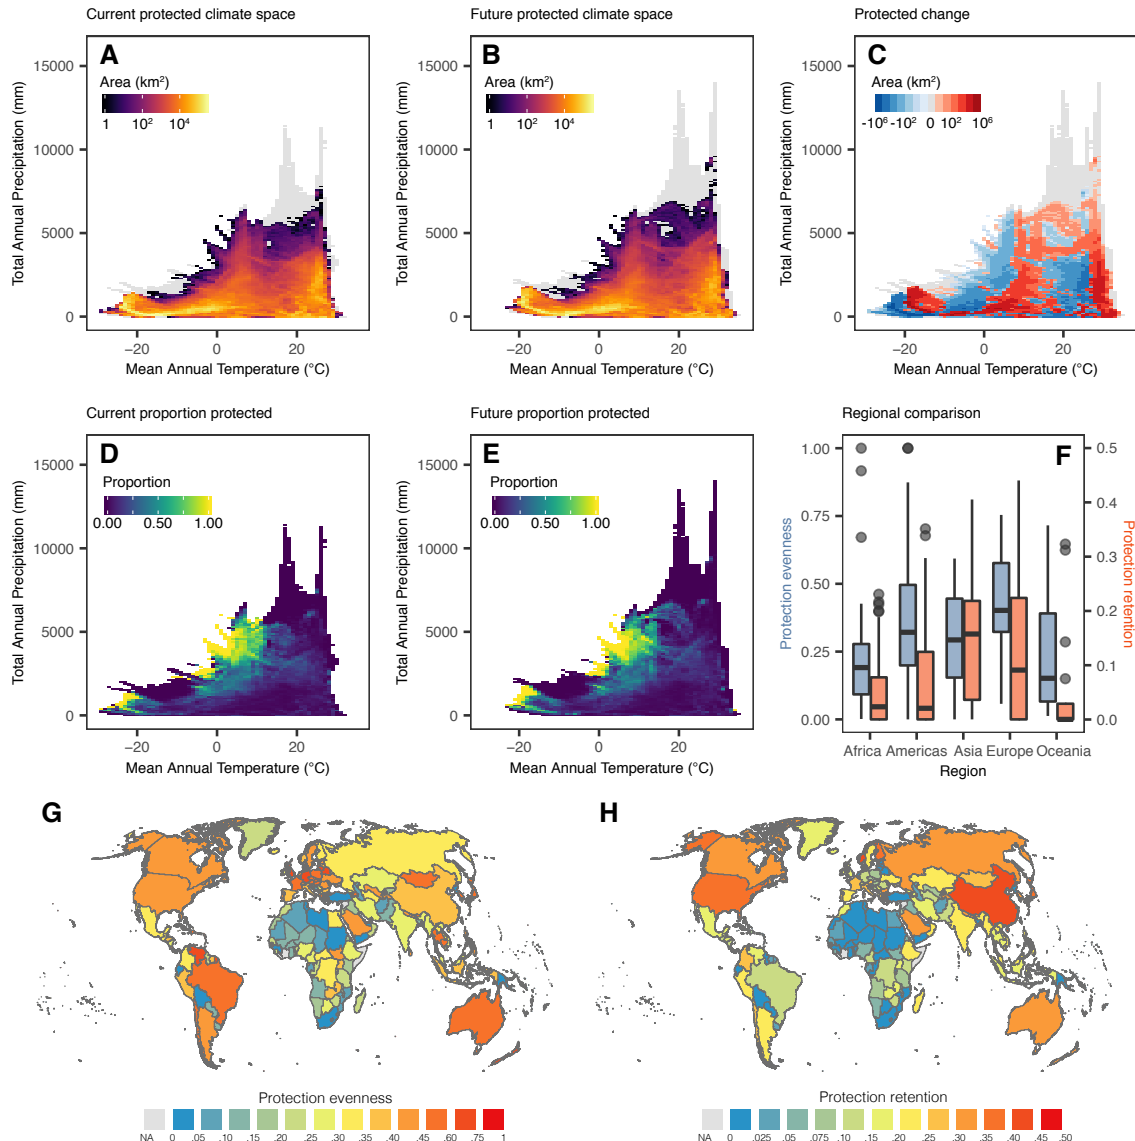

**Fig. S3.** Current and future protected climate space, and regional and geographic distribution of protection evenness and protection retention for IUCN I-VI PAs. **(A)** Current and **(B)** future protected climate space, calculated as the 2-dimensional frequency distribution of annual mean temperature and annual precipitation, discretized into 1 °C temperature and 100 mm precipitation bins, within IUCN I-VI protected areas. **(C)** Subtracting the current from future protected climate space yields the expected temporal change. The proportion protected of each climate bin in current **(D)** and future **(E)** is calculated by dividing the protected climate space distribution by the available climate space distribution protection (see Fig. 1A and 1C). **(F)** Protection evenness and retention across regions for IUCN I-VI PAs (see also Fig. 2). Maps of **(G)** protection evenness and **(H)** protection retention for IUCN I-VI PAs ( $n = 218$  countries; see also Fig. 3).

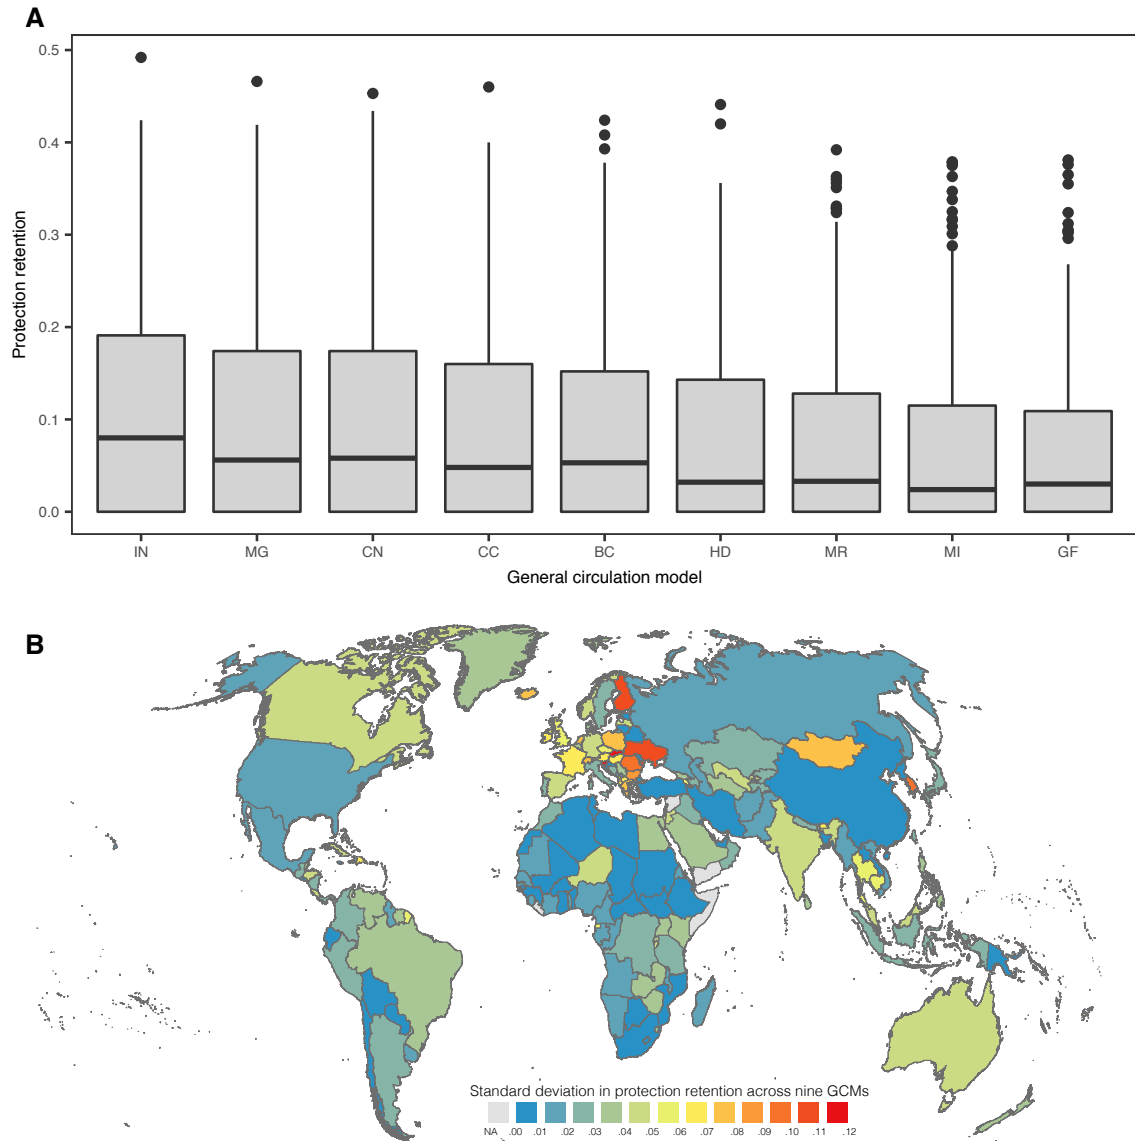

**Fig. S4. Protection retention across GCMs.** (A) Boxplots of protection retention (ordered by increasing predicted temperature warming) and (B) map of the standard deviation of protection retention across the nine GCMs considered in this study ( $n = 205$  countries).

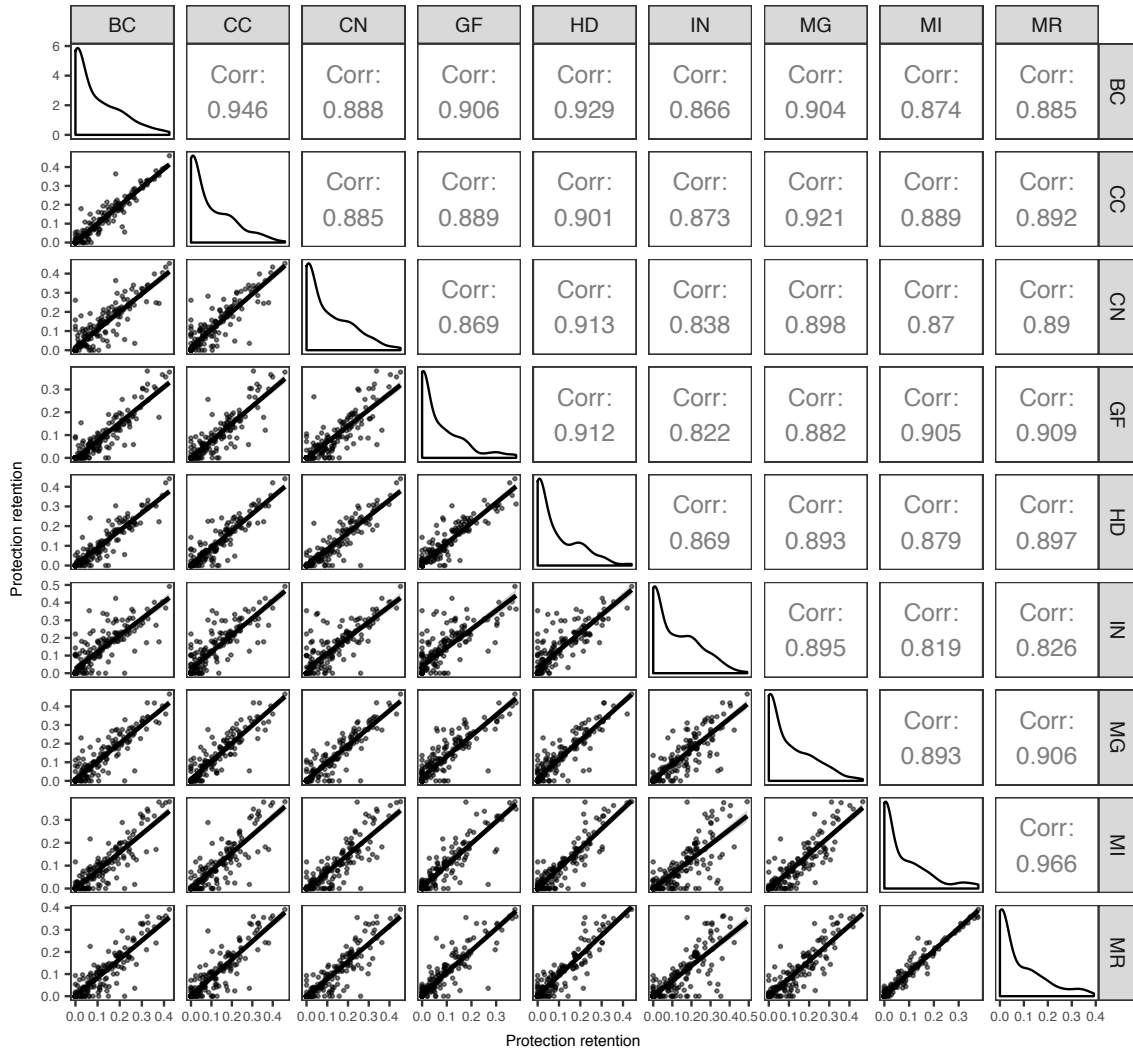

**Fig. S5. Protection retention correlation matrix across GCMs.** Correlations between protection retention for all pairwise combinations of GCMs considered in this study ( $n = 205$  countries, black points; smoothed model fit, black line). Spearman rank correlation coefficients given for each plot are statistically significant at  $P < 0.001$ . Table S1 for GCMs associated with codes.

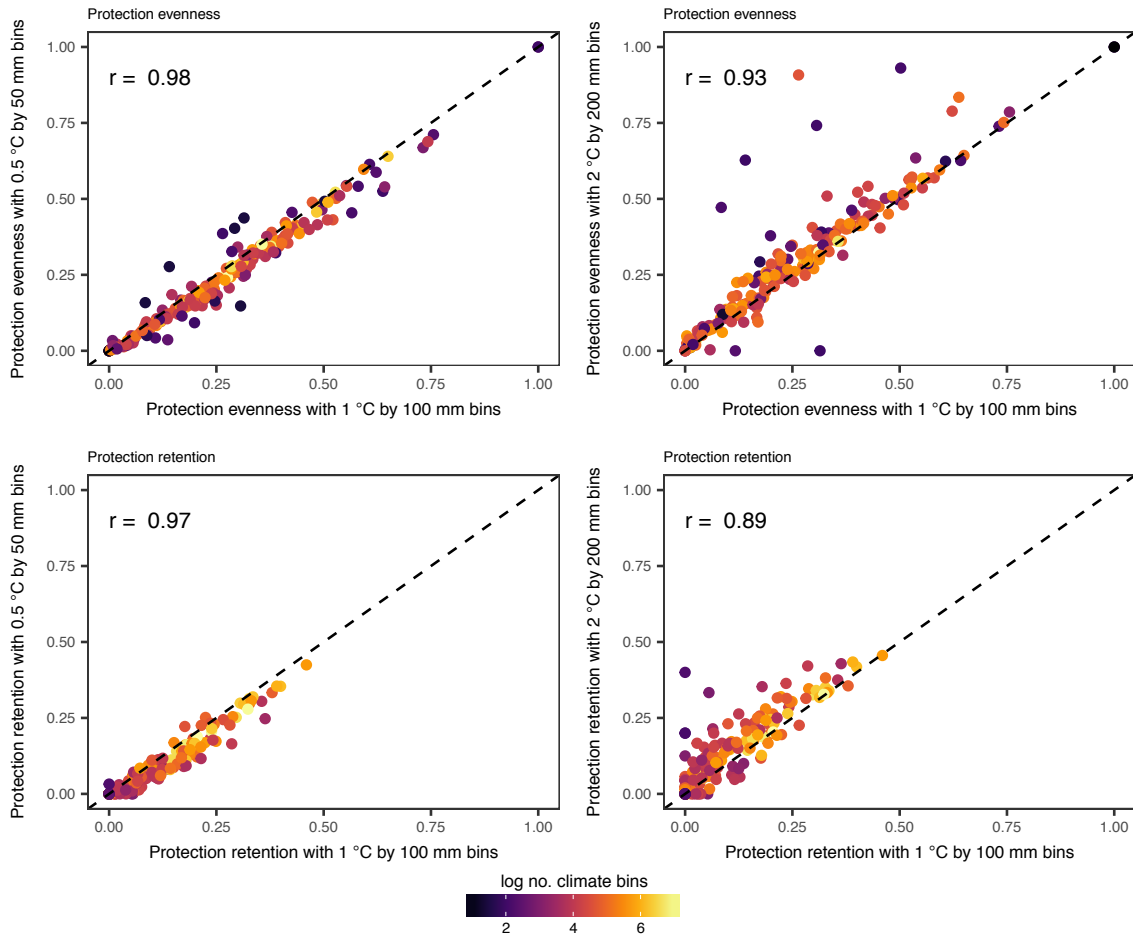

**Fig. S6. Protection evenness and protection retention sensitivity analysis.** Results of sensitivity analyses assessing finer (first column) and coarser (second column) climate bins for calculations of protection evenness (top row), and protection retention (bottom row). Colors of points reflect the log number of climate bins per country ( $n = 205$  countries). Spearman rank correlation coefficients ( $r$ ) given for each plot are statistically significant at  $P < 0.001$ . Protection retention calculations are based on future projections from the CCSM4 general circulation model.

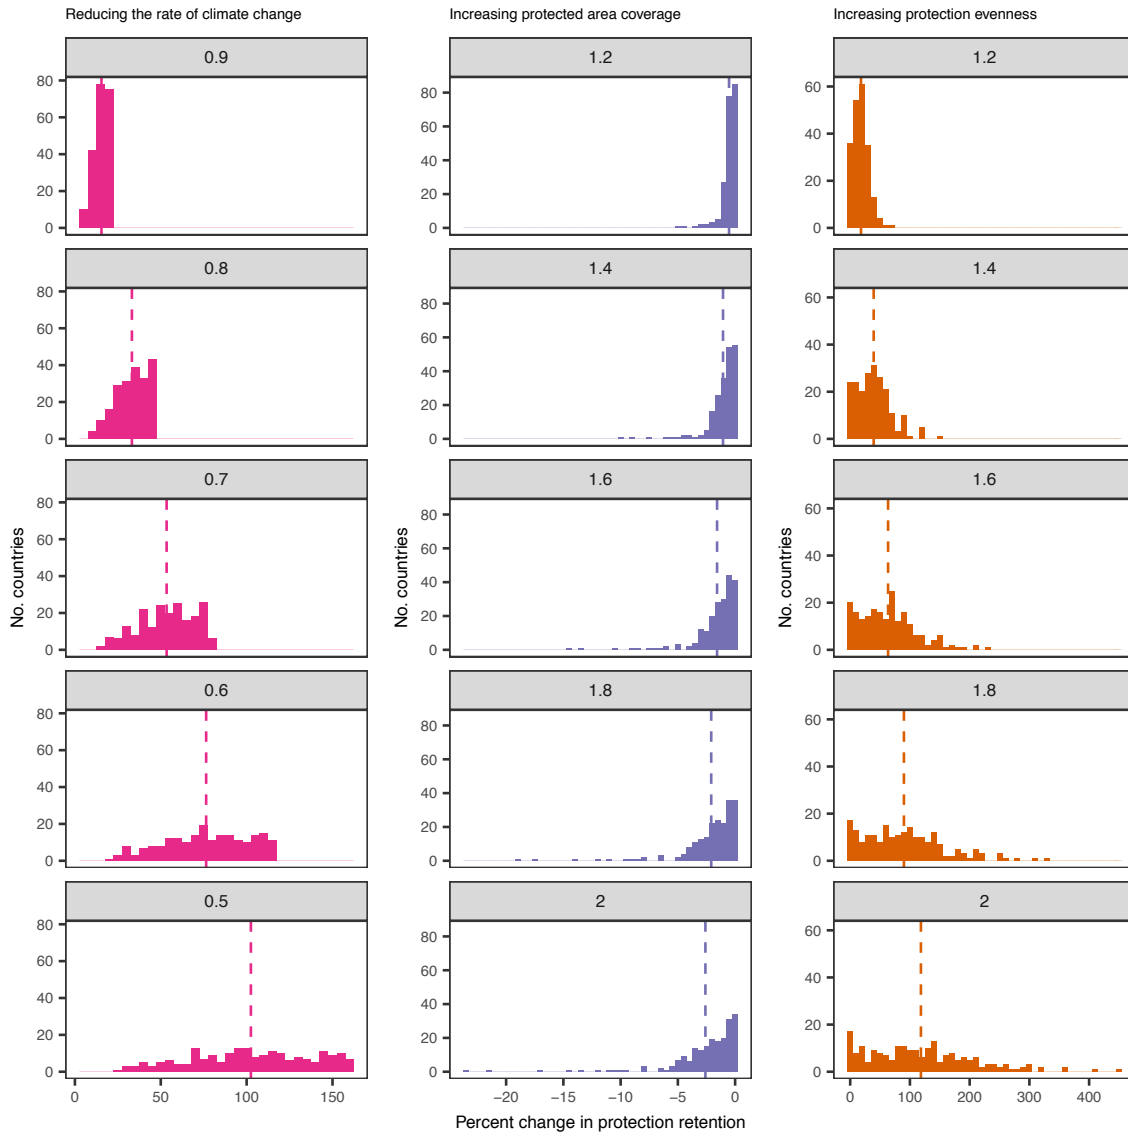

**Fig. S7. Protection retention under alternative mitigation and adaptation scenarios.** Histograms of percent change in protection retention resulting from reducing the rate of climate change (first column), increasing protected area coverage (second column), and increasing protection evenness (third column), while keeping all other factors (including country size) constant, based on quasi-binomial model output. Numbers above plots refer to the scaling factor for the variable of interest. Vertical dashed lines refer to mean values across countries. Protection retention calculations are based on future projections from the CCSM4 general circulation model.



**Table S1. Country level data derived and calculated in this study.** Data include country size, an index of the rate of climate change, the proportion of land area protected, protection evenness, and protection retention calculated for the nine GCMs considered, with mean, median, and standard deviation summary statistics calculated across all models ( $n = 205$  countries; two-letter codes given for each GCM).

| Country                           | Size               | Rate of        | Proportion | Protection | BCC-CSM1-1 | CCSM4 | CNRM-CM5 | GFDL-CM3 | HadGEM2-AO | INMCM4 | MRI-CGCM3 | MIROC-ESM-CHEM | MIROC-ESM | Mean  | Median | Std Dev |
|-----------------------------------|--------------------|----------------|------------|------------|------------|-------|----------|----------|------------|--------|-----------|----------------|-----------|-------|--------|---------|
|                                   | (km <sup>2</sup> ) | climate change | protected  | evenness   | BC         | CC    | CN       | GF       | HD         | IN     | MG        | MI             | MR        | GCMs  | GCMs   | GCMs    |
| Afghanistan                       | 903591             | 0.960          | 0.005      | 0.061      | 0.049      | 0.041 | 0.027    | 0.011    | 0.022      | 0.079  | 0.027     | 0.036          | 0.038     | 0.037 | 0.036  | 0.020   |
| Albania                           | 43690              | 1.177          | 0.133      | 0.396      | 0.165      | 0.196 | 0.227    | 0.062    | 0.165      | 0.103  | 0.268     | 0.113          | 0.124     | 0.158 | 0.165  | 0.065   |
| Algeria                           | 3061884            | 1.233          | 0.042      | 0.096      | 0.007      | 0.022 | 0.022    | 0.000    | 0.022      | 0.029  | 0.015     | 0.029          | 0.007     | 0.017 | 0.022  | 0.010   |
| Andorra                           | 714                | 1.880          | 0.183      | 0.732      | 0.222      | 0.056 | 0.056    | 0.056    | 0.056      | 0.000  | 0.000     | 0.000          | 0.000     | 0.049 | 0.056  | 0.071   |
| Angola                            | 1494122            | 1.558          | 0.066      | 0.130      | 0.055      | 0.073 | 0.073    | 0.030    | 0.042      | 0.067  | 0.073     | 0.067          | 0.061     | 0.060 | 0.067  | 0.015   |
| Argentina                         | 4003402            | 0.942          | 0.023      | 0.301      | 0.199      | 0.207 | 0.220    | 0.197    | 0.242      | 0.217  | 0.250     | 0.195          | 0.195     | 0.214 | 0.207  | 0.021   |
| Armenia                           | 45279              | 1.373          | 0.124      | 0.331      | 0.235      | 0.235 | 0.162    | 0.162    | 0.221      | 0.265  | 0.206     | 0.103          | 0.162     | 0.194 | 0.206  | 0.051   |
| Australia                         | 9999748            | 1.020          | 0.095      | 0.496      | 0.294      | 0.327 | 0.286    | 0.221    | 0.216      | 0.271  | 0.227     | 0.325          | 0.328     | 0.277 | 0.286  | 0.046   |
| Austria                           | 144393             | 1.320          | 0.086      | 0.353      | 0.364      | 0.380 | 0.248    | 0.302    | 0.302      | 0.271  | 0.318     | 0.171          | 0.240     | 0.289 | 0.302  | 0.065   |
| Azerbaijan                        | 131536             | 1.465          | 0.097      | 0.522      | 0.167      | 0.176 | 0.176    | 0.157    | 0.206      | 0.196  | 0.216     | 0.167          | 0.147     | 0.179 | 0.176  | 0.023   |
| Bahamas                           | 15980              | 1.984          | 0.012      | 0.058      | 0.000      | 0.000 | 0.000    | 0.000    | 0.000      | 0.000  | 0.000     | 0.000          | 0.000     | 0.000 | 0.000  | 0.000   |
| Bangladesh                        | 172236             | 1.995          | 0.017      | 0.120      | 0.000      | 0.000 | 0.010    | 0.000    | 0.000      | 0.010  | 0.000     | 0.000          | 0.000     | 0.002 | 0.000  | 0.004   |
| Barbados                          | 527                | 2.000          | 0.017      | 0.199      | 0.000      | 0.000 | 0.000    | 0.000    | 0.000      | 0.000  | 0.000     | 0.000          | 0.000     | 0.000 | 0.000  | 0.000   |
| Belarus                           | 403826             | 2.000          | 0.069      | 0.638      | 0.000      | 0.000 | 0.000    | 0.000    | 0.000      | 0.000  | 0.000     | 0.000          | 0.000     | 0.000 | 0.000  | 0.000   |
| Belgium                           | 56197              | 1.997          | 0.131      | 0.553      | 0.000      | 0.000 | 0.000    | 0.000    | 0.000      | 0.100  | 0.050     | 0.000          | 0.000     | 0.017 | 0.000  | 0.035   |
| Belize                            | 26794              | 1.804          | 0.194      | 0.417      | 0.057      | 0.045 | 0.114    | 0.034    | 0.057      | 0.080  | 0.080     | 0.000          | 0.023     | 0.054 | 0.057  | 0.034   |
| Benin                             | 136945             | 2.000          | 0.075      | 0.167      | 0.000      | 0.000 | 0.000    | 0.000    | 0.000      | 0.000  | 0.000     | 0.000          | 0.000     | 0.000 | 0.000  | 0.000   |
| Bermuda                           | 88                 | 2.000          | 0.011      | 0.000      | 0.000      | 0.000 | 0.000    | 0.000    | 0.000      | 0.000  | 0.000     | 0.000          | 0.000     | 0.000 | 0.000  | 0.000   |
| Bhutan                            | 50949              | 1.102          | 0.424      | 0.435      | 0.275      | 0.223 | 0.303    | 0.171    | 0.208      | 0.260  | 0.306     | 0.125          | 0.144     | 0.224 | 0.223  | 0.067   |
| Bolivia                           | 1323543            | 1.593          | 0.005      | 0.046      | 0.014      | 0.014 | 0.020    | 0.000    | 0.022      | 0.002  | 0.014     | 0.002          | 0.004     | 0.010 | 0.014  | 0.009   |
| Bonaire, Saint Eustatius and Saba | 370                | 1.989          | 0.195      | 0.496      | 0.000      | 0.000 | 0.158    | 0.000    | 0.053      | 0.105  | 0.000     | 0.000          | 0.000     | 0.035 | 0.000  | 0.059   |
| Bosnia and Herzegovina            | 82770              | 1.478          | 0.004      | 0.093      | 0.076      | 0.076 | 0.091    | 0.045    | 0.045      | 0.015  | 0.030     | 0.045          | 0.076     | 0.056 | 0.045  | 0.025   |
| Botswana                          | 729177             | 1.948          | 0.189      | 0.280      | 0.000      | 0.000 | 0.000    | 0.000    | 0.000      | 0.000  | 0.000     | 0.000          | 0.000     | 0.000 | 0.000  | 0.000   |
| Brazil                            | 10191785           | 1.484          | 0.058      | 0.350      | 0.202      | 0.178 | 0.174    | 0.121    | 0.180      | 0.213  | 0.255     | 0.158          | 0.185     | 0.185 | 0.180  | 0.037   |
| British Virgin Islands            | 168                | 2.000          | 0.054      | 0.174      | 0.000      | 0.000 | 0.125    | 0.000    | 0.000      | 0.000  | 0.000     | 0.000          | 0.000     | 0.014 | 0.000  | 0.042   |
| Brunei                            | 6746               | 1.893          | 0.190      | 0.485      | 0.149      | 0.128 | 0.021    | 0.000    | 0.000      | 0.064  | 0.043     | 0.021          | 0.000     | 0.047 | 0.021  | 0.056   |
| Bulgaria                          | 176649             | 1.560          | 0.022      | 0.309      | 0.378      | 0.356 | 0.244    | 0.178    | 0.222      | 0.178  | 0.311     | 0.378          | 0.356     | 0.289 | 0.311  | 0.084   |
| Burkina Faso                      | 327232             | 2.000          | 0.111      | 0.124      | 0.000      | 0.000 | 0.000    | 0.000    | 0.000      | 0.000  | 0.000     | 0.000          | 0.000     | 0.000 | 0.000  | 0.000   |
| Burundi                           | 31568              | 1.731          | 0.044      | 0.136      | 0.111      | 0.069 | 0.125    | 0.042    | 0.111      | 0.097  | 0.111     | 0.014          | 0.028     | 0.079 | 0.097  | 0.042   |
| Cambodia                          | 217198             | 1.846          | 0.190      | 0.526      | 0.125      | 0.193 | 0.193    | 0.119    | 0.108      | 0.239  | 0.142     | 0.068          | 0.114     | 0.145 | 0.125  | 0.053   |
| Cameroon                          | 547934             | 1.775          | 0.096      | 0.284      | 0.108      | 0.108 | 0.132    | 0.063    | 0.105      | 0.122  | 0.118     | 0.108          | 0.108     | 0.108 | 0.108  | 0.019   |
| Canada                            | 24299301           | 1.140          | 0.106      | 0.434      | 0.357      | 0.335 | 0.398    | 0.312    | 0.310      | 0.402  | 0.418     | 0.317          | 0.314     | 0.351 | 0.335  | 0.044   |
| Caspian Sea                       | 363394             | 1.459          | 0.015      | 0.051      | 0.053      | 0.035 | 0.018    | 0.035    | 0.018      | 0.000  | 0.018     | 0.035          | 0.018     | 0.025 | 0.018  | 0.015   |
| Cayman Islands                    | 326                | 2.000          | 0.101      | 0.314      | 0.000      | 0.000 | 0.000    | 0.000    | 0.000      | 0.000  | 0.000     | 0.000          | 0.000     | 0.000 | 0.000  | 0.000   |
| Central African Republic          | 730564             | 1.955          | 0.118      | 0.295      | 0.019      | 0.019 | 0.019    | 0.019    | 0.019      | 0.019  | 0.019     | 0.000          | 0.019     | 0.017 | 0.019  | 0.006   |
| Chad                              | 1542724            | 1.471          | 0.093      | 0.084      | 0.000      | 0.000 | 0.011    | 0.000    | 0.000      | 0.011  | 0.000     | 0.000          | 0.000     | 0.002 | 0.000  | 0.005   |

|                                  |          |       |       |       |       |       |       |       |       |       |       |       |       |       |       |       |
|----------------------------------|----------|-------|-------|-------|-------|-------|-------|-------|-------|-------|-------|-------|-------|-------|-------|-------|
| Chile                            | 1113731  | 0.943 | 0.210 | 0.527 | 0.304 | 0.296 | 0.301 | 0.304 | 0.305 | 0.308 | 0.319 | 0.316 | 0.324 | 0.309 | 0.305 | 0.009 |
| China                            | 13693562 | 0.923 | 0.000 | 0.025 | 0.027 | 0.024 | 0.030 | 0.015 | 0.015 | 0.030 | 0.026 | 0.014 | 0.012 | 0.022 | 0.024 | 0.007 |
| Christmas Island                 | 165      | 2.000 | 0.624 | 0.607 | 0.000 | 0.000 | 0.000 | 0.000 | 0.000 | 0.000 | 0.000 | 0.000 | 0.000 | 0.000 | 0.000 | 0.000 |
| Colombia                         | 1334005  | 1.515 | 0.118 | 0.274 | 0.266 | 0.239 | 0.235 | 0.194 | 0.221 | 0.239 | 0.254 | 0.252 | 0.254 | 0.239 | 0.239 | 0.022 |
| Costa Rica                       | 60540    | 1.444 | 0.145 | 0.381 | 0.150 | 0.104 | 0.218 | 0.190 | 0.227 | 0.224 | 0.234 | 0.197 | 0.202 | 0.194 | 0.202 | 0.042 |
| Côte d'Ivoire                    | 379649   | 1.977 | 0.063 | 0.143 | 0.022 | 0.011 | 0.022 | 0.000 | 0.000 | 0.033 | 0.011 | 0.011 | 0.033 | 0.016 | 0.011 | 0.012 |
| Croatia                          | 92960    | 1.515 | 0.001 | 0.029 | 0.000 | 0.000 | 0.000 | 0.000 | 0.000 | 0.000 | 0.000 | 0.000 | 0.000 | 0.000 | 0.000 | 0.000 |
| Cuba                             | 137471   | 1.839 | 0.119 | 0.379 | 0.067 | 0.048 | 0.133 | 0.067 | 0.105 | 0.133 | 0.181 | 0.095 | 0.095 | 0.103 | 0.095 | 0.041 |
| Curaçao                          | 497      | 2.000 | 0.052 | 0.084 | 0.000 | 0.000 | 0.000 | 0.000 | 0.000 | 0.000 | 0.000 | 0.000 | 0.000 | 0.000 | 0.000 | 0.000 |
| Cyprus                           | 8044     | 1.788 | 0.034 | 0.223 | 0.032 | 0.065 | 0.032 | 0.065 | 0.032 | 0.129 | 0.161 | 0.065 | 0.097 | 0.075 | 0.065 | 0.046 |
| Czech Republic                   | 141510   | 1.909 | 0.024 | 0.294 | 0.043 | 0.109 | 0.022 | 0.022 | 0.022 | 0.174 | 0.087 | 0.000 | 0.000 | 0.053 | 0.022 | 0.059 |
| Democratic Republic of the Congo | 2734620  | 1.661 | 0.048 | 0.293 | 0.115 | 0.120 | 0.151 | 0.089 | 0.120 | 0.188 | 0.146 | 0.115 | 0.125 | 0.130 | 0.120 | 0.028 |
| Denmark                          | 87887    | 2.000 | 0.106 | 0.622 | 0.000 | 0.000 | 0.000 | 0.000 | 0.000 | 0.100 | 0.000 | 0.000 | 0.000 | 0.011 | 0.000 | 0.033 |
| Djibouti                         | 26077    | 1.841 | 0.000 | 0.000 | 0.000 | 0.000 | 0.000 | 0.000 | 0.000 | 0.000 | 0.000 | 0.000 | 0.000 | 0.000 | 0.000 | 0.000 |
| Dominica                         | 880      | 2.000 | 0.139 | 0.335 | 0.032 | 0.000 | 0.111 | 0.000 | 0.143 | 0.032 | 0.000 | 0.000 | 0.000 | 0.035 | 0.000 | 0.054 |
| Dominican Republic               | 59335    | 1.684 | 0.164 | 0.436 | 0.212 | 0.083 | 0.282 | 0.256 | 0.224 | 0.301 | 0.276 | 0.288 | 0.295 | 0.246 | 0.276 | 0.069 |
| Ecuador                          | 299459   | 1.332 | 0.001 | 0.019 | 0.006 | 0.005 | 0.005 | 0.000 | 0.000 | 0.006 | 0.002 | 0.000 | 0.006 | 0.003 | 0.005 | 0.003 |
| Egypt                            | 1282058  | 1.264 | 0.012 | 0.313 | 0.111 | 0.111 | 0.074 | 0.074 | 0.037 | 0.111 | 0.111 | 0.074 | 0.037 | 0.082 | 0.074 | 0.031 |
| El Salvador                      | 24531    | 1.984 | 0.001 | 0.034 | 0.000 | 0.000 | 0.000 | 0.000 | 0.009 | 0.000 | 0.000 | 0.000 | 0.000 | 0.001 | 0.000 | 0.003 |
| Equatorial Guinea                | 31381    | 1.637 | 0.168 | 0.427 | 0.103 | 0.044 | 0.103 | 0.029 | 0.118 | 0.176 | 0.029 | 0.132 | 0.132 | 0.096 | 0.103 | 0.052 |
| Eritrea                          | 145239   | 1.553 | 0.049 | 0.187 | 0.071 | 0.071 | 0.061 | 0.051 | 0.030 | 0.051 | 0.061 | 0.040 | 0.040 | 0.053 | 0.051 | 0.014 |
| Estonia                          | 100755   | 2.000 | 0.078 | 0.580 | 0.000 | 0.000 | 0.000 | 0.000 | 0.000 | 0.000 | 0.000 | 0.000 | 0.000 | 0.000 | 0.000 | 0.000 |
| Ethiopia                         | 1337562  | 1.108 | 0.040 | 0.133 | 0.094 | 0.085 | 0.100 | 0.088 | 0.076 | 0.097 | 0.103 | 0.103 | 0.097 | 0.094 | 0.097 | 0.009 |
| Falkland Islands                 | 22331    | 1.960 | 0.004 | 0.137 | 0.000 | 0.000 | 0.000 | 0.000 | 0.000 | 0.000 | 0.000 | 0.000 | 0.000 | 0.000 | 0.000 | 0.000 |
| Fiji                             | 21517    | 1.956 | 0.024 | 0.158 | 0.014 | 0.014 | 0.041 | 0.054 | 0.041 | 0.041 | 0.122 | 0.014 | 0.000 | 0.038 | 0.041 | 0.036 |
| Finland                          | 901695   | 1.521 | 0.104 | 0.300 | 0.182 | 0.364 | 0.364 | 0.121 | 0.303 | 0.424 | 0.273 | 0.182 | 0.242 | 0.273 | 0.273 | 0.101 |
| France                           | 926899   | 1.481 | 0.014 | 0.292 | 0.321 | 0.327 | 0.253 | 0.296 | 0.290 | 0.173 | 0.278 | 0.160 | 0.210 | 0.257 | 0.278 | 0.062 |
| French Guiana                    | 97408    | 1.987 | 0.293 | 0.509 | 0.028 | 0.028 | 0.028 | 0.000 | 0.000 | 0.181 | 0.056 | 0.014 | 0.000 | 0.037 | 0.028 | 0.057 |
| French Southern Territories      | 13484    | 1.998 | 0.138 | 0.367 | 0.054 | 0.000 | 0.081 | 0.027 | 0.081 | 0.162 | 0.081 | 0.000 | 0.027 | 0.057 | 0.054 | 0.051 |
| Gabon                            | 309134   | 1.741 | 0.021 | 0.073 | 0.011 | 0.034 | 0.057 | 0.000 | 0.023 | 0.023 | 0.023 | 0.023 | 0.023 | 0.024 | 0.023 | 0.016 |
| Gambia                           | 12795    | 1.993 | 0.002 | 0.041 | 0.000 | 0.000 | 0.000 | 0.000 | 0.000 | 0.000 | 0.000 | 0.000 | 0.000 | 0.000 | 0.000 | 0.000 |
| Georgia                          | 109577   | 1.308 | 0.078 | 0.296 | 0.218 | 0.200 | 0.212 | 0.147 | 0.224 | 0.218 | 0.235 | 0.141 | 0.153 | 0.194 | 0.212 | 0.037 |
| Germany                          | 660055   | 1.866 | 0.042 | 0.410 | 0.103 | 0.161 | 0.161 | 0.092 | 0.103 | 0.172 | 0.218 | 0.103 | 0.126 | 0.138 | 0.126 | 0.043 |
| Ghana                            | 281556   | 1.930 | 0.045 | 0.110 | 0.000 | 0.014 | 0.014 | 0.000 | 0.000 | 0.000 | 0.000 | 0.014 | 0.014 | 0.006 | 0.000 | 0.008 |
| Greece                           | 194583   | 1.047 | 0.088 | 0.529 | 0.188 | 0.225 | 0.297 | 0.087 | 0.232 | 0.181 | 0.275 | 0.174 | 0.101 | 0.196 | 0.188 | 0.071 |
| Greenland                        | 9242077  | 1.332 | 0.505 | 0.204 | 0.145 | 0.189 | 0.196 | 0.091 | 0.157 | 0.183 | 0.179 | 0.132 | 0.143 | 0.157 | 0.157 | 0.033 |
| Grenada                          | 425      | 2.000 | 0.073 | 0.172 | 0.071 | 0.000 | 0.000 | 0.071 | 0.000 | 0.000 | 0.000 | 0.071 | 0.071 | 0.032 | 0.000 | 0.038 |
| Guadeloupe                       | 1881     | 1.741 | 0.163 | 0.320 | 0.046 | 0.046 | 0.108 | 0.015 | 0.031 | 0.015 | 0.000 | 0.000 | 0.015 | 0.031 | 0.015 | 0.034 |
| Guam                             | 651      | 1.985 | 0.214 | 0.388 | 0.000 | 0.000 | 0.000 | 0.000 | 0.000 | 0.000 | 0.000 | 0.000 | 0.000 | 0.000 | 0.000 | 0.000 |
| Guatemala                        | 132474   | 1.400 | 0.047 | 0.178 | 0.035 | 0.042 | 0.100 | 0.074 | 0.052 | 0.059 | 0.117 | 0.076 | 0.079 | 0.071 | 0.074 | 0.026 |
| Guinea                           | 290976   | 1.639 | 0.002 | 0.025 | 0.000 | 0.000 | 0.000 | 0.000 | 0.000 | 0.000 | 0.000 | 0.000 | 0.000 | 0.000 | 0.000 | 0.000 |
| Guinea-Bissau                    | 39721    | 2.000 | 0.014 | 0.032 | 0.000 | 0.000 | 0.000 | 0.000 | 0.000 | 0.000 | 0.000 | 0.000 | 0.000 | 0.000 | 0.000 | 0.000 |
| Guyana                           | 246201   | 1.845 | 0.004 | 0.110 | 0.026 | 0.017 | 0.017 | 0.000 | 0.013 | 0.052 | 0.000 | 0.000 | 0.000 | 0.014 | 0.013 | 0.017 |

|                                   |         |       |       |       |       |       |       |       |       |       |       |       |       |       |       |       |
|-----------------------------------|---------|-------|-------|-------|-------|-------|-------|-------|-------|-------|-------|-------|-------|-------|-------|-------|
| Haiti                             | 33397   | 1.602 | 0.009 | 0.094 | 0.035 | 0.000 | 0.035 | 0.046 | 0.023 | 0.052 | 0.064 | 0.046 | 0.040 | 0.038 | 0.040 | 0.018 |
| Heard Island and McDonald Islands | 673     | 2.000 | 1.000 | 1.000 | 0.000 | 0.000 | 0.000 | 0.000 | 0.000 | 0.000 | 0.000 | 0.000 | 0.000 | 0.000 | 0.000 | 0.000 |
| Honduras                          | 135528  | 1.711 | 0.180 | 0.391 | 0.219 | 0.160 | 0.266 | 0.148 | 0.168 | 0.191 | 0.215 | 0.133 | 0.125 | 0.181 | 0.168 | 0.046 |
| Hungary                           | 158980  | 1.972 | 0.027 | 0.167 | 0.136 | 0.136 | 0.091 | 0.000 | 0.000 | 0.000 | 0.136 | 0.000 | 0.045 | 0.061 | 0.045 | 0.064 |
| Iceland                           | 277238  | 1.578 | 0.159 | 0.273 | 0.067 | 0.150 | 0.192 | 0.083 | 0.242 | 0.225 | 0.058 | 0.217 | 0.225 | 0.162 | 0.192 | 0.074 |
| India                             | 4009129 | 1.456 | 0.043 | 0.276 | 0.244 | 0.205 | 0.230 | 0.150 | 0.193 | 0.227 | 0.282 | 0.172 | 0.178 | 0.209 | 0.205 | 0.041 |
| Indonesia                         | 2198275 | 1.460 | 0.109 | 0.377 | 0.200 | 0.181 | 0.212 | 0.137 | 0.217 | 0.218 | 0.199 | 0.199 | 0.198 | 0.196 | 0.199 | 0.025 |
| Iran                              | 2244239 | 0.940 | 0.032 | 0.104 | 0.060 | 0.056 | 0.069 | 0.056 | 0.056 | 0.065 | 0.074 | 0.056 | 0.056 | 0.061 | 0.056 | 0.007 |
| Iraq                              | 619110  | 1.584 | 0.007 | 0.154 | 0.010 | 0.057 | 0.076 | 0.019 | 0.067 | 0.095 | 0.076 | 0.029 | 0.048 | 0.053 | 0.057 | 0.029 |
| Ireland                           | 134337  | 1.660 | 0.009 | 0.280 | 0.152 | 0.174 | 0.196 | 0.043 | 0.130 | 0.196 | 0.174 | 0.087 | 0.043 | 0.133 | 0.152 | 0.061 |
| Isle of Man                       | 1098    | 2.000 | 0.039 | 0.239 | 0.000 | 0.000 | 0.000 | 0.000 | 0.000 | 0.000 | 0.000 | 0.000 | 0.000 | 0.000 | 0.000 | 0.000 |
| Israel                            | 30130   | 1.727 | 0.118 | 0.226 | 0.127 | 0.141 | 0.211 | 0.099 | 0.113 | 0.197 | 0.183 | 0.113 | 0.141 | 0.147 | 0.141 | 0.041 |
| Italy                             | 473937  | 1.271 | 0.087 | 0.362 | 0.305 | 0.288 | 0.321 | 0.305 | 0.276 | 0.284 | 0.337 | 0.309 | 0.329 | 0.306 | 0.305 | 0.021 |
| Jamaica                           | 13432   | 1.510 | 0.000 | 0.000 | 0.000 | 0.000 | 0.000 | 0.000 | 0.000 | 0.000 | 0.000 | 0.000 | 0.000 | 0.000 | 0.000 | 0.000 |
| Japan                             | 542463  | 0.872 | 0.117 | 0.452 | 0.408 | 0.400 | 0.434 | 0.355 | 0.420 | 0.369 | 0.359 | 0.375 | 0.363 | 0.387 | 0.375 | 0.029 |
| Jordan                            | 121509  | 1.763 | 0.007 | 0.217 | 0.103 | 0.086 | 0.121 | 0.052 | 0.069 | 0.121 | 0.103 | 0.017 | 0.017 | 0.077 | 0.086 | 0.041 |
| Kazakhstan                        | 4760137 | 1.458 | 0.018 | 0.245 | 0.193 | 0.205 | 0.175 | 0.135 | 0.175 | 0.199 | 0.199 | 0.158 | 0.175 | 0.179 | 0.175 | 0.023 |
| Kenya                             | 685718  | 1.317 | 0.058 | 0.166 | 0.140 | 0.121 | 0.150 | 0.124 | 0.176 | 0.173 | 0.117 | 0.078 | 0.081 | 0.129 | 0.124 | 0.035 |
| Kosovo                            | 17246   | 1.605 | 0.008 | 0.091 | 0.032 | 0.048 | 0.032 | 0.000 | 0.016 | 0.000 | 0.048 | 0.032 | 0.032 | 0.026 | 0.032 | 0.018 |
| Kuwait                            | 23051   | 2.000 | 0.149 | 0.293 | 0.000 | 0.000 | 0.000 | 0.000 | 0.000 | 0.000 | 0.000 | 0.000 | 0.000 | 0.000 | 0.000 | 0.000 |
| Kyrgyzstan                        | 308363  | 0.778 | 0.064 | 0.192 | 0.193 | 0.193 | 0.134 | 0.122 | 0.130 | 0.181 | 0.143 | 0.130 | 0.134 | 0.151 | 0.134 | 0.029 |
| Laos                              | 283383  | 1.189 | 0.001 | 0.043 | 0.023 | 0.008 | 0.019 | 0.004 | 0.012 | 0.016 | 0.012 | 0.012 | 0.012 | 0.013 | 0.012 | 0.006 |
| Latvia                            | 136954  | 2.000 | 0.093 | 0.264 | 0.000 | 0.000 | 0.000 | 0.000 | 0.000 | 0.143 | 0.000 | 0.000 | 0.000 | 0.016 | 0.000 | 0.048 |
| Lebanon                           | 14160   | 1.258 | 0.000 | 0.000 | 0.000 | 0.000 | 0.000 | 0.000 | 0.000 | 0.000 | 0.000 | 0.000 | 0.000 | 0.000 | 0.000 | 0.000 |
| Lesotho                           | 40970   | 1.453 | 0.002 | 0.017 | 0.000 | 0.000 | 0.000 | 0.000 | 0.000 | 0.000 | 0.000 | 0.000 | 0.000 | 0.000 | 0.000 | 0.000 |
| Libya                             | 2119527 | 1.585 | 0.000 | 0.001 | 0.000 | 0.000 | 0.000 | 0.000 | 0.000 | 0.000 | 0.000 | 0.000 | 0.000 | 0.000 | 0.000 | 0.000 |
| Liechtenstein                     | 276     | 1.819 | 0.134 | 0.317 | 0.105 | 0.053 | 0.000 | 0.105 | 0.053 | 0.000 | 0.000 | 0.000 | 0.000 | 0.035 | 0.000 | 0.046 |
| Lithuania                         | 132467  | 2.000 | 0.049 | 0.566 | 0.000 | 0.000 | 0.000 | 0.000 | 0.000 | 0.000 | 0.000 | 0.000 | 0.000 | 0.000 | 0.000 | 0.000 |
| Luxembourg                        | 4638    | 2.000 | 0.408 | 0.756 | 0.000 | 0.000 | 0.000 | 0.000 | 0.000 | 0.000 | 0.000 | 0.000 | 0.000 | 0.000 | 0.000 | 0.000 |
| Macedonia                         | 38610   | 1.533 | 0.078 | 0.329 | 0.171 | 0.114 | 0.100 | 0.100 | 0.071 | 0.286 | 0.200 | 0.086 | 0.100 | 0.137 | 0.100 | 0.070 |
| Madagascar                        | 731447  | 1.237 | 0.023 | 0.183 | 0.208 | 0.188 | 0.196 | 0.167 | 0.171 | 0.233 | 0.192 | 0.200 | 0.192 | 0.194 | 0.192 | 0.020 |
| Malawi                            | 141781  | 1.344 | 0.085 | 0.173 | 0.069 | 0.097 | 0.118 | 0.076 | 0.097 | 0.111 | 0.090 | 0.083 | 0.104 | 0.094 | 0.097 | 0.016 |
| Malaysia                          | 384650  | 1.539 | 0.059 | 0.285 | 0.245 | 0.249 | 0.216 | 0.136 | 0.190 | 0.311 | 0.220 | 0.220 | 0.212 | 0.222 | 0.220 | 0.047 |
| Mali                              | 1534516 | 1.996 | 0.039 | 0.087 | 0.000 | 0.000 | 0.000 | 0.000 | 0.000 | 0.000 | 0.000 | 0.000 | 0.000 | 0.000 | 0.000 | 0.000 |
| Malta                             | 412     | 2.000 | 0.126 | 0.502 | 0.000 | 0.000 | 0.000 | 0.000 | 0.000 | 0.000 | 0.000 | 0.000 | 0.000 | 0.000 | 0.000 | 0.000 |
| Marshall Islands                  | 59      | 2.000 | 0.034 | 0.012 | 0.000 | 0.000 | 0.000 | 0.000 | 0.000 | 0.000 | 0.000 | 0.000 | 0.000 | 0.000 | 0.000 | 0.000 |
| Martinique                        | 1321    | 1.935 | 0.050 | 0.161 | 0.062 | 0.015 | 0.015 | 0.000 | 0.077 | 0.092 | 0.000 | 0.000 | 0.000 | 0.029 | 0.015 | 0.037 |
| Mauritania                        | 1297261 | 1.651 | 0.005 | 0.055 | 0.032 | 0.032 | 0.032 | 0.000 | 0.032 | 0.032 | 0.032 | 0.000 | 0.000 | 0.022 | 0.032 | 0.016 |
| Mauritius                         | 2407    | 1.705 | 0.039 | 0.176 | 0.083 | 0.125 | 0.125 | 0.042 | 0.083 | 0.083 | 0.042 | 0.042 | 0.042 | 0.074 | 0.083 | 0.035 |
| Mayotte                           | 436     | 1.761 | 0.037 | 0.286 | 0.000 | 0.000 | 0.000 | 0.000 | 0.000 | 0.000 | 0.000 | 0.000 | 0.000 | 0.000 | 0.000 | 0.000 |
| Mexico                            | 2498099 | 1.080 | 0.015 | 0.112 | 0.152 | 0.145 | 0.170 | 0.152 | 0.159 | 0.159 | 0.180 | 0.152 | 0.148 | 0.157 | 0.152 | 0.011 |
| Moldova                           | 57965   | 2.000 | 0.000 | 0.108 | 0.000 | 0.000 | 0.000 | 0.000 | 0.000 | 0.000 | 0.000 | 0.000 | 0.000 | 0.000 | 0.000 | 0.000 |
| Mongolia                          | 2661512 | 1.335 | 0.152 | 0.554 | 0.255 | 0.266 | 0.319 | 0.181 | 0.181 | 0.362 | 0.287 | 0.149 | 0.170 | 0.241 | 0.255 | 0.074 |

|                                  |          |       |       |       |       |       |       |       |       |       |       |       |       |       |       |       |
|----------------------------------|----------|-------|-------|-------|-------|-------|-------|-------|-------|-------|-------|-------|-------|-------|-------|-------|
| Montenegro                       | 21031    | 1.666 | 0.001 | 0.056 | 0.000 | 0.039 | 0.000 | 0.000 | 0.000 | 0.000 | 0.000 | 0.000 | 0.000 | 0.004 | 0.000 | 0.013 |
| Morocco                          | 567322   | 1.286 | 0.019 | 0.208 | 0.119 | 0.159 | 0.172 | 0.093 | 0.126 | 0.159 | 0.172 | 0.106 | 0.113 | 0.135 | 0.126 | 0.030 |
| Mozambique                       | 964138   | 1.682 | 0.060 | 0.062 | 0.000 | 0.011 | 0.006 | 0.000 | 0.000 | 0.006 | 0.000 | 0.006 | 0.006 | 0.004 | 0.006 | 0.004 |
| Myanmar                          | 834798   | 1.153 | 0.071 | 0.287 | 0.183 | 0.200 | 0.207 | 0.189 | 0.174 | 0.229 | 0.179 | 0.178 | 0.183 | 0.191 | 0.183 | 0.018 |
| Namibia                          | 1039689  | 1.596 | 0.121 | 0.189 | 0.087 | 0.072 | 0.087 | 0.058 | 0.072 | 0.087 | 0.087 | 0.087 | 0.072 | 0.079 | 0.087 | 0.011 |
| Nepal                            | 195556   | 1.000 | 0.081 | 0.185 | 0.175 | 0.179 | 0.199 | 0.175 | 0.179 | 0.177 | 0.186 | 0.136 | 0.136 | 0.171 | 0.177 | 0.022 |
| Netherlands                      | 66416    | 2.000 | 0.108 | 0.426 | 0.000 | 0.000 | 0.000 | 0.000 | 0.000 | 0.222 | 0.111 | 0.000 | 0.000 | 0.037 | 0.000 | 0.079 |
| New Caledonia                    | 22576    | 1.615 | 0.024 | 0.207 | 0.083 | 0.075 | 0.092 | 0.042 | 0.075 | 0.100 | 0.142 | 0.058 | 0.092 | 0.084 | 0.083 | 0.028 |
| New Zealand                      | 418672   | 1.011 | 0.259 | 0.650 | 0.325 | 0.306 | 0.338 | 0.381 | 0.312 | 0.363 | 0.419 | 0.347 | 0.360 | 0.350 | 0.347 | 0.036 |
| Nicaragua                        | 153441   | 1.572 | 0.059 | 0.208 | 0.122 | 0.101 | 0.157 | 0.098 | 0.098 | 0.129 | 0.129 | 0.056 | 0.111 | 0.111 | 0.111 | 0.028 |
| Niger                            | 1451248  | 1.850 | 0.158 | 0.146 | 0.000 | 0.023 | 0.000 | 0.093 | 0.000 | 0.000 | 0.000 | 0.116 | 0.093 | 0.036 | 0.000 | 0.049 |
| Nigeria                          | 1077948  | 1.789 | 0.030 | 0.255 | 0.062 | 0.057 | 0.088 | 0.062 | 0.067 | 0.036 | 0.062 | 0.083 | 0.062 | 0.064 | 0.062 | 0.015 |
| Niue                             | 318      | 2.000 | 0.204 | 0.140 | 0.000 | 0.000 | 0.000 | 0.000 | 0.000 | 0.000 | 0.000 | 0.000 | 0.000 | 0.000 | 0.000 | 0.000 |
| North Korea                      | 185532   | 1.253 | 0.000 | 0.004 | 0.000 | 0.000 | 0.000 | 0.000 | 0.000 | 0.000 | 0.000 | 0.000 | 0.000 | 0.000 | 0.000 | 0.000 |
| Northern Mariana Islands         | 528      | 1.811 | 0.004 | 0.001 | 0.000 | 0.000 | 0.000 | 0.000 | 0.000 | 0.000 | 0.000 | 0.000 | 0.000 | 0.000 | 0.000 | 0.000 |
| Norway                           | 860132   | 0.972 | 0.131 | 0.334 | 0.424 | 0.460 | 0.453 | 0.376 | 0.441 | 0.492 | 0.466 | 0.379 | 0.392 | 0.432 | 0.441 | 0.041 |
| Oman                             | 385666   | 1.844 | 0.024 | 0.131 | 0.057 | 0.057 | 0.057 | 0.057 | 0.057 | 0.114 | 0.057 | 0.086 | 0.086 | 0.070 | 0.057 | 0.021 |
| Pakistan                         | 1177506  | 1.223 | 0.045 | 0.120 | 0.142 | 0.142 | 0.142 | 0.093 | 0.119 | 0.150 | 0.117 | 0.113 | 0.128 | 0.127 | 0.128 | 0.019 |
| Palestina                        | 8521     | 1.566 | 0.036 | 0.192 | 0.000 | 0.054 | 0.108 | 0.000 | 0.000 | 0.108 | 0.081 | 0.027 | 0.054 | 0.048 | 0.054 | 0.044 |
| Panama                           | 88206    | 1.570 | 0.117 | 0.338 | 0.095 | 0.091 | 0.083 | 0.037 | 0.062 | 0.120 | 0.095 | 0.058 | 0.108 | 0.083 | 0.091 | 0.026 |
| Papua New Guinea                 | 543113   | 1.316 | 0.001 | 0.003 | 0.000 | 0.000 | 0.000 | 0.000 | 0.000 | 0.000 | 0.000 | 0.000 | 0.000 | 0.000 | 0.000 | 0.000 |
| Paraguay                         | 508002   | 1.989 | 0.024 | 0.135 | 0.000 | 0.000 | 0.000 | 0.000 | 0.000 | 0.000 | 0.000 | 0.000 | 0.000 | 0.000 | 0.000 | 0.000 |
| Peru                             | 1535468  | 1.390 | 0.076 | 0.285 | 0.133 | 0.157 | 0.149 | 0.106 | 0.124 | 0.187 | 0.147 | 0.129 | 0.135 | 0.141 | 0.135 | 0.023 |
| Philippines                      | 350717   | 1.394 | 0.091 | 0.307 | 0.194 | 0.169 | 0.192 | 0.142 | 0.183 | 0.228 | 0.172 | 0.108 | 0.178 | 0.174 | 0.178 | 0.034 |
| Poland                           | 589794   | 1.955 | 0.012 | 0.364 | 0.080 | 0.100 | 0.020 | 0.020 | 0.040 | 0.240 | 0.100 | 0.000 | 0.000 | 0.067 | 0.040 | 0.076 |
| Portugal                         | 138222   | 1.590 | 0.018 | 0.185 | 0.209 | 0.174 | 0.226 | 0.191 | 0.183 | 0.191 | 0.200 | 0.174 | 0.130 | 0.186 | 0.191 | 0.027 |
| Puerto Rico                      | 10938    | 1.662 | 0.015 | 0.081 | 0.000 | 0.000 | 0.000 | 0.000 | 0.000 | 0.000 | 0.009 | 0.000 | 0.000 | 0.001 | 0.000 | 0.003 |
| Qatar                            | 14655    | 2.000 | 0.000 | 0.000 | 0.000 | 0.000 | 0.000 | 0.000 | 0.000 | 0.000 | 0.000 | 0.000 | 0.000 | 0.000 | 0.000 | 0.000 |
| Republic of Congo                | 400093   | 1.936 | 0.092 | 0.222 | 0.017 | 0.000 | 0.000 | 0.000 | 0.000 | 0.034 | 0.000 | 0.000 | 0.000 | 0.006 | 0.000 | 0.012 |
| Reunion                          | 2994     | 1.618 | 0.447 | 0.537 | 0.026 | 0.179 | 0.179 | 0.154 | 0.026 | 0.077 | 0.231 | 0.026 | 0.026 | 0.103 | 0.077 | 0.083 |
| Romania                          | 397462   | 1.656 | 0.021 | 0.348 | 0.125 | 0.125 | 0.054 | 0.089 | 0.089 | 0.339 | 0.054 | 0.036 | 0.054 | 0.107 | 0.089 | 0.093 |
| Russia                           | 41975401 | 0.976 | 0.071 | 0.312 | 0.299 | 0.313 | 0.322 | 0.266 | 0.307 | 0.303 | 0.320 | 0.285 | 0.285 | 0.300 | 0.303 | 0.018 |
| Rwanda                           | 29604    | 1.909 | 0.088 | 0.308 | 0.036 | 0.000 | 0.072 | 0.012 | 0.084 | 0.048 | 0.072 | 0.000 | 0.036 | 0.040 | 0.036 | 0.032 |
| Saint-Barthélemy                 | 20       | 2.000 | 0.150 | 0.000 | 0.000 | 0.000 | 0.000 | 0.000 | 0.000 | 0.000 | 0.000 | 0.000 | 0.000 | 0.000 | 0.000 | 0.000 |
| Saint-Martin                     | 66       | 2.000 | 0.106 | 0.088 | 0.000 | 0.000 | 0.000 | 0.000 | 0.000 | 0.000 | 0.000 | 0.000 | 0.000 | 0.000 | 0.000 | 0.000 |
| Saint Helena                     | 499      | 1.707 | 0.016 | 0.045 | 0.000 | 0.000 | 0.000 | 0.000 | 0.000 | 0.000 | 0.000 | 0.000 | 0.000 | 0.000 | 0.000 | 0.000 |
| Saint Lucia                      | 744      | 2.000 | 0.142 | 0.321 | 0.043 | 0.000 | 0.087 | 0.000 | 0.000 | 0.000 | 0.000 | 0.000 | 0.000 | 0.014 | 0.000 | 0.031 |
| Saint Pierre and Miquelon        | 366      | 2.000 | 0.014 | 0.306 | 0.000 | 0.000 | 0.000 | 0.000 | 0.000 | 0.000 | 0.000 | 0.000 | 0.000 | 0.000 | 0.000 | 0.000 |
| Saint Vincent and the Grenadines | 465      | 2.000 | 0.351 | 0.642 | 0.000 | 0.000 | 0.261 | 0.087 | 0.000 | 0.000 | 0.000 | 0.000 | 0.000 | 0.039 | 0.000 | 0.088 |
| Samoa                            | 3319     | 1.554 | 0.023 | 0.077 | 0.000 | 0.000 | 0.000 | 0.000 | 0.000 | 0.000 | 0.000 | 0.000 | 0.000 | 0.000 | 0.000 | 0.000 |
| Saudi Arabia                     | 2444450  | 1.522 | 0.022 | 0.189 | 0.242 | 0.242 | 0.242 | 0.161 | 0.194 | 0.242 | 0.210 | 0.161 | 0.177 | 0.208 | 0.210 | 0.036 |
| Senegal                          | 237252   | 1.771 | 0.105 | 0.250 | 0.018 | 0.036 | 0.036 | 0.000 | 0.036 | 0.036 | 0.036 | 0.000 | 0.018 | 0.024 | 0.036 | 0.016 |
| Serbia                           | 126877   | 1.804 | 0.031 | 0.201 | 0.108 | 0.123 | 0.123 | 0.031 | 0.077 | 0.092 | 0.123 | 0.077 | 0.077 | 0.092 | 0.092 | 0.031 |

|                                      |          |       |       |       |       |       |       |       |       |       |       |       |       |       |       |       |       |
|--------------------------------------|----------|-------|-------|-------|-------|-------|-------|-------|-------|-------|-------|-------|-------|-------|-------|-------|-------|
| Seychelles                           | 297      | 2.000 | 0.121 | 0.008 | 0.000 | 0.000 | 0.000 | 0.000 | 0.000 | 0.000 | 0.000 | 0.000 | 0.000 | 0.000 | 0.000 | 0.000 | 0.000 |
| Sierra Leone                         | 85436    | 1.804 | 0.028 | 0.223 | 0.042 | 0.063 | 0.070 | 0.021 | 0.021 | 0.028 | 0.035 | 0.035 | 0.042 | 0.040 | 0.035 | 0.017 |       |
| Singapore                            | 717      | 2.000 | 0.053 | 0.117 | 0.000 | 0.000 | 0.000 | 0.000 | 0.000 | 0.000 | 0.000 | 0.000 | 0.000 | 0.000 | 0.000 | 0.000 | 0.000 |
| Slovakia                             | 86366    | 1.938 | 0.069 | 0.454 | 0.062 | 0.104 | 0.000 | 0.000 | 0.000 | 0.354 | 0.062 | 0.000 | 0.000 | 0.065 | 0.000 | 0.115 |       |
| Slovenia                             | 33491    | 1.402 | 0.050 | 0.171 | 0.268 | 0.286 | 0.036 | 0.268 | 0.214 | 0.125 | 0.054 | 0.018 | 0.036 | 0.145 | 0.125 | 0.114 |       |
| South Africa                         | 1627806  | 1.175 | 0.000 | 0.004 | 0.000 | 0.000 | 0.000 | 0.000 | 0.000 | 0.000 | 0.000 | 0.000 | 0.000 | 0.000 | 0.000 | 0.000 | 0.000 |
| South Korea                          | 141478   | 1.692 | 0.075 | 0.405 | 0.262 | 0.282 | 0.340 | 0.058 | 0.204 | 0.350 | 0.282 | 0.136 | 0.262 | 0.242 | 0.262 | 0.095 |       |
| South Sudan                          | 740851   | 1.926 | 0.102 | 0.107 | 0.000 | 0.000 | 0.000 | 0.000 | 0.000 | 0.000 | 0.000 | 0.009 | 0.018 | 0.003 | 0.000 | 0.006 |       |
| Spain                                | 769825   | 1.151 | 0.027 | 0.245 | 0.224 | 0.245 | 0.307 | 0.172 | 0.240 | 0.271 | 0.328 | 0.203 | 0.219 | 0.245 | 0.240 | 0.050 |       |
| Sri Lanka                            | 77366    | 1.759 | 0.287 | 0.443 | 0.236 | 0.214 | 0.264 | 0.167 | 0.246 | 0.217 | 0.174 | 0.196 | 0.181 | 0.211 | 0.214 | 0.034 |       |
| Sudan                                | 2280715  | 1.561 | 0.004 | 0.014 | 0.000 | 0.000 | 0.000 | 0.000 | 0.000 | 0.000 | 0.000 | 0.000 | 0.000 | 0.000 | 0.000 | 0.000 | 0.000 |
| Suriname                             | 171395   | 1.963 | 0.101 | 0.335 | 0.044 | 0.029 | 0.029 | 0.000 | 0.015 | 0.118 | 0.015 | 0.000 | 0.000 | 0.028 | 0.015 | 0.037 |       |
| Svalbard and Jan Mayen               | 351417   | 1.976 | 0.653 | 0.743 | 0.083 | 0.067 | 0.000 | 0.033 | 0.067 | 0.100 | 0.100 | 0.050 | 0.050 | 0.061 | 0.067 | 0.032 |       |
| Swaziland                            | 22667    | 1.789 | 0.052 | 0.243 | 0.019 | 0.019 | 0.093 | 0.037 | 0.019 | 0.111 | 0.093 | 0.056 | 0.074 | 0.058 | 0.056 | 0.036 |       |
| Sweden                               | 1134624  | 1.195 | 0.110 | 0.411 | 0.236 | 0.236 | 0.236 | 0.209 | 0.264 | 0.300 | 0.264 | 0.245 | 0.264 | 0.251 | 0.245 | 0.026 |       |
| Switzerland                          | 69978    | 1.596 | 0.062 | 0.402 | 0.186 | 0.169 | 0.081 | 0.134 | 0.128 | 0.297 | 0.134 | 0.047 | 0.058 | 0.137 | 0.134 | 0.076 |       |
| Taiwan                               | 45848    | 1.165 | 0.197 | 0.510 | 0.393 | 0.391 | 0.405 | 0.365 | 0.356 | 0.405 | 0.402 | 0.363 | 0.351 | 0.381 | 0.391 | 0.022 |       |
| Tajikistan                           | 211430   | 1.001 | 0.185 | 0.413 | 0.328 | 0.331 | 0.341 | 0.252 | 0.331 | 0.308 | 0.341 | 0.338 | 0.331 | 0.322 | 0.331 | 0.028 |       |
| Tanzania                             | 1107272  | 1.276 | 0.125 | 0.210 | 0.084 | 0.072 | 0.106 | 0.091 | 0.078 | 0.144 | 0.103 | 0.091 | 0.141 | 0.101 | 0.091 | 0.026 |       |
| Thailand                             | 622451   | 1.451 | 0.208 | 0.593 | 0.147 | 0.151 | 0.172 | 0.118 | 0.109 | 0.298 | 0.151 | 0.109 | 0.118 | 0.153 | 0.147 | 0.059 |       |
| Togo                                 | 67435    | 1.947 | 0.073 | 0.252 | 0.025 | 0.025 | 0.025 | 0.000 | 0.025 | 0.050 | 0.000 | 0.000 | 0.000 | 0.017 | 0.025 | 0.018 |       |
| Trinidad and Tobago                  | 6082     | 1.931 | 0.272 | 0.466 | 0.058 | 0.019 | 0.058 | 0.019 | 0.019 | 0.077 | 0.019 | 0.019 | 0.038 | 0.036 | 0.019 | 0.022 |       |
| Tunisia                              | 217747   | 1.929 | 0.001 | 0.040 | 0.000 | 0.000 | 0.000 | 0.000 | 0.000 | 0.000 | 0.000 | 0.000 | 0.000 | 0.000 | 0.000 | 0.000 | 0.000 |
| Turkey                               | 1168238  | 1.052 | 0.000 | 0.005 | 0.000 | 0.000 | 0.004 | 0.000 | 0.000 | 0.000 | 0.009 | 0.000 | 0.000 | 0.001 | 0.000 | 0.003 |       |
| Turkmenistan                         | 735369   | 1.847 | 0.029 | 0.314 | 0.135 | 0.115 | 0.096 | 0.077 | 0.077 | 0.173 | 0.096 | 0.077 | 0.077 | 0.103 | 0.096 | 0.033 |       |
| Turks and Caicos Islands             | 1172     | 2.000 | 0.367 | 0.246 | 0.000 | 0.000 | 0.000 | 0.000 | 0.000 | 0.000 | 0.000 | 0.000 | 0.000 | 0.000 | 0.000 | 0.000 | 0.000 |
| Uganda                               | 282746   | 1.480 | 0.082 | 0.374 | 0.177 | 0.143 | 0.206 | 0.126 | 0.171 | 0.229 | 0.171 | 0.120 | 0.194 | 0.171 | 0.171 | 0.036 |       |
| Ukraine                              | 1063096  | 1.967 | 0.024 | 0.383 | 0.143 | 0.214 | 0.048 | 0.048 | 0.048 | 0.333 | 0.143 | 0.024 | 0.024 | 0.114 | 0.048 | 0.106 |       |
| United Arab Emirates                 | 98709    | 1.969 | 0.000 | 0.000 | 0.000 | 0.000 | 0.000 | 0.000 | 0.000 | 0.000 | 0.000 | 0.000 | 0.000 | 0.000 | 0.000 | 0.000 | 0.000 |
| United Kingdom                       | 480299   | 1.450 | 0.092 | 0.474 | 0.182 | 0.215 | 0.248 | 0.132 | 0.174 | 0.306 | 0.223 | 0.140 | 0.140 | 0.196 | 0.182 | 0.058 |       |
| United States                        | 16065707 | 1.017 | 0.120 | 0.356 | 0.326 | 0.324 | 0.328 | 0.324 | 0.290 | 0.333 | 0.345 | 0.301 | 0.299 | 0.319 | 0.324 | 0.018 |       |
| United States Minor Outlying Islands | 21       | 2.000 | 1.000 | 1.000 | 0.000 | 0.000 | 0.000 | 0.000 | 0.000 | 0.000 | 0.000 | 0.000 | 0.000 | 0.000 | 0.000 | 0.000 | 0.000 |
| Uruguay                              | 246036   | 1.863 | 0.002 | 0.009 | 0.038 | 0.038 | 0.038 | 0.000 | 0.000 | 0.000 | 0.038 | 0.038 | 0.038 | 0.026 | 0.038 | 0.019 |       |
| Uzbekistan                           | 697943   | 1.458 | 0.020 | 0.416 | 0.100 | 0.100 | 0.073 | 0.109 | 0.027 | 0.182 | 0.073 | 0.118 | 0.109 | 0.099 | 0.100 | 0.042 |       |
| Venezuela                            | 1075066  | 1.552 | 0.149 | 0.484 | 0.260 | 0.239 | 0.258 | 0.184 | 0.239 | 0.312 | 0.244 | 0.236 | 0.251 | 0.247 | 0.244 | 0.033 |       |
| Vietnam                              | 399985   | 1.107 | 0.045 | 0.270 | 0.185 | 0.188 | 0.214 | 0.179 | 0.182 | 0.220 | 0.201 | 0.173 | 0.182 | 0.192 | 0.185 | 0.017 |       |
| Virgin Islands, U.S.                 | 404      | 2.000 | 0.007 | 0.018 | 0.000 | 0.000 | 0.000 | 0.000 | 0.000 | 0.000 | 0.000 | 0.000 | 0.000 | 0.000 | 0.000 | 0.000 | 0.000 |
| Western Sahara                       | 343047   | 1.346 | 0.060 | 0.170 | 0.000 | 0.000 | 0.000 | 0.000 | 0.000 | 0.000 | 0.000 | 0.000 | 0.000 | 0.000 | 0.000 | 0.000 | 0.000 |
| Zambia                               | 903821   | 1.685 | 0.081 | 0.239 | 0.107 | 0.067 | 0.133 | 0.053 | 0.067 | 0.133 | 0.080 | 0.053 | 0.040 | 0.081 | 0.067 | 0.035 |       |
| Zimbabwe                             | 482902   | 1.472 | 0.069 | 0.224 | 0.114 | 0.120 | 0.150 | 0.072 | 0.072 | 0.150 | 0.120 | 0.078 | 0.054 | 0.103 | 0.114 | 0.035 |       |

**Table S2. Model-averaged parameter estimates for predictors of protection retention.** Standardized and centered model-averaged estimates ( $\beta$ ), standard errors (S.E.), adjusted standard errors (Adj. S.E.), lower (Lower CI) and upper (Upper CI) 95% confidence intervals, z values, and significance values.

|                           | $\beta$ | S.E.  | Adj. S.E. | Lower CI | Upper CI | z value | Pr(> z ) |
|---------------------------|---------|-------|-----------|----------|----------|---------|----------|
| (Intercept)               | -2.408  | 0.077 | 0.078     | -2.560   | -2.256   | 31.070  | <0.001   |
| Country size              | 0.343   | 0.070 | 0.071     | 0.204    | 0.482    | 4.844   | <0.001   |
| Rate of climate change    | -0.323  | 0.053 | 0.053     | -0.427   | -0.219   | 6.101   | <0.001   |
| Proportion land protected | -0.013  | 0.045 | 0.045     | -0.190   | 0.101    | 0.292   | 0.770    |
| Protection evenness       | 0.712   | 0.056 | 0.056     | 0.602    | 0.821    | 12.729  | <0.001   |

**Table S3. Summaries for the 16 candidate model sets considered and used in model-averaging.**

| (Intercept) | Rate of climate change | Proportion land protected | Protection evenness | Country size | df | logLik    | QAICc   | Delta   | Weight |
|-------------|------------------------|---------------------------|---------------------|--------------|----|-----------|---------|---------|--------|
| -2.409      | -0.323                 | -                         | 0.705               | 0.345        | 4  | -1099.956 | 315.402 | 0.000   | 0.705  |
| -2.406      | -0.324                 | -0.045                    | 0.728               | 0.337        | 5  | -1098.601 | 317.149 | 1.747   | 0.295  |
| -2.247      | -0.429                 | -0.127                    | 0.745               | -            | 4  | -1179.706 | 337.523 | 22.121  | 0.000  |
| -2.241      | -0.436                 | -                         | 0.673               | -            | 3  | -1190.043 | 338.288 | 22.886  | 0.000  |
| -2.258      | -                      | -                         | 0.755               | 0.535        | 3  | -1237.843 | 351.547 | 36.145  | 0.000  |
| -2.256      | -                      | -0.038                    | 0.775               | 0.528        | 4  | -1236.776 | 353.352 | 37.950  | 0.000  |
| -1.857      | -                      | -0.185                    | 0.832               | -            | 3  | -1489.533 | 421.359 | 105.957 | 0.000  |
| -1.838      | -                      | -                         | 0.726               | -            | 2  | -1511.667 | 425.418 | 110.016 | 0.000  |
| -2.325      | -0.404                 | 0.415                     | -                   | 0.323        | 4  | -1631.686 | 462.891 | 147.489 | 0.000  |
| -2.175      | -0.505                 | 0.386                     | -                   | -            | 3  | -1712.534 | 483.215 | 167.812 | 0.000  |
| -2.106      | -                      | 0.429                     | -                   | 0.553        | 3  | -1852.341 | 521.993 | 206.591 | 0.000  |
| -2.293      | -0.425                 | -                         | -                   | 0.271        | 3  | -1865.215 | 525.564 | 210.162 | 0.000  |
| -2.170      | -0.511                 | -                         | -                   | -            | 2  | -1920.202 | 538.736 | 223.334 | 0.000  |
| -2.073      | -                      | -                         | -                   | 0.522        | 2  | -2106.798 | 590.493 | 275.091 | 0.000  |
| -1.686      | -                      | 0.385                     | -                   | -            | 2  | -2151.037 | 602.764 | 287.362 | 0.000  |
| -1.676      | -                      | -                         | -                   | -            | 1  | -2367.327 | 660.697 | 345.295 | 0.000  |
